# Supplementary material for: Behavioral Responses of Melipona scutellaris to Changing Climatic Conditions in the Atlantic Forest of Northeast Brazil
Source: Research Square preprint supplement (doi:10.21203/rs.3.rs-7676102/v1), 2026-01-20
Supplement: Supplementary file 1 [file 8ad82efa217410d1b69019a8.pdf]

# Supplementary material

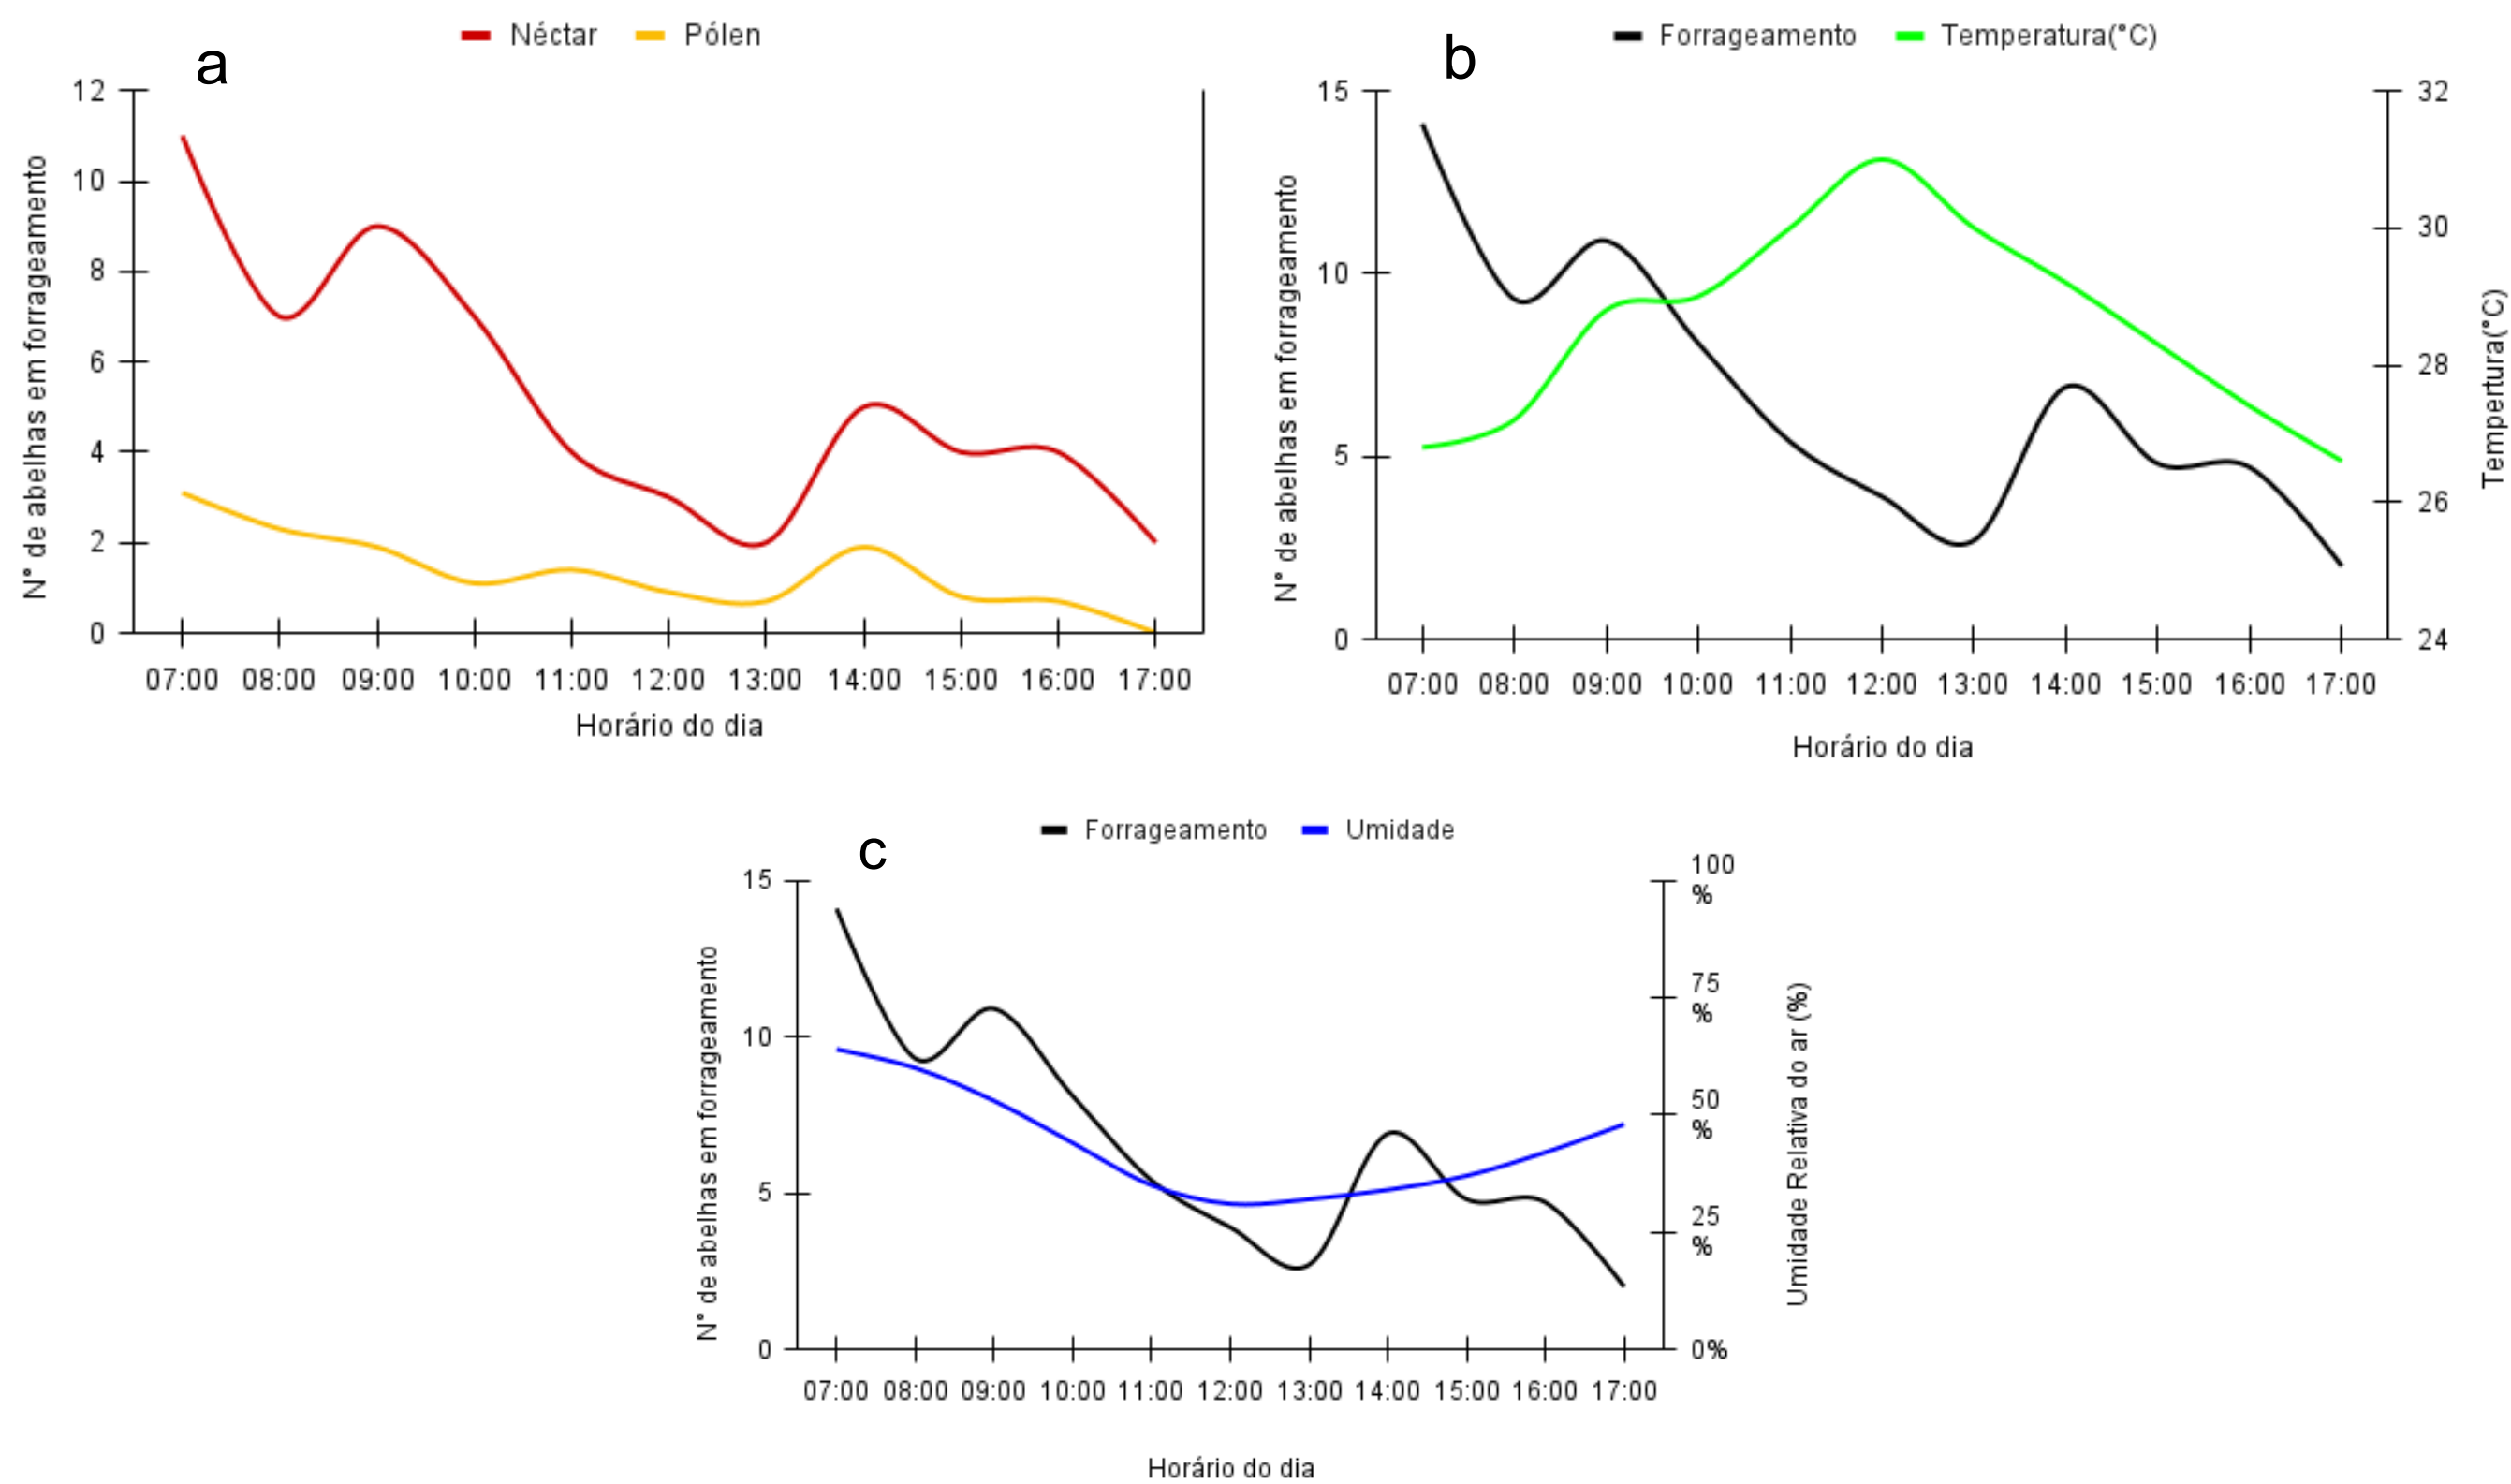

**Fig. 1** Seasonal foraging behavior of *M. scutellaris* during spring 2022. a) Foraging patterns for nectar/water (red line) and polle/resins (yellow lines); b) Foraging patterns (black line) in relation to temperature fluctuations(green line); c) Foraging pattern (black line) in relation to variations in air humidity (blue line).

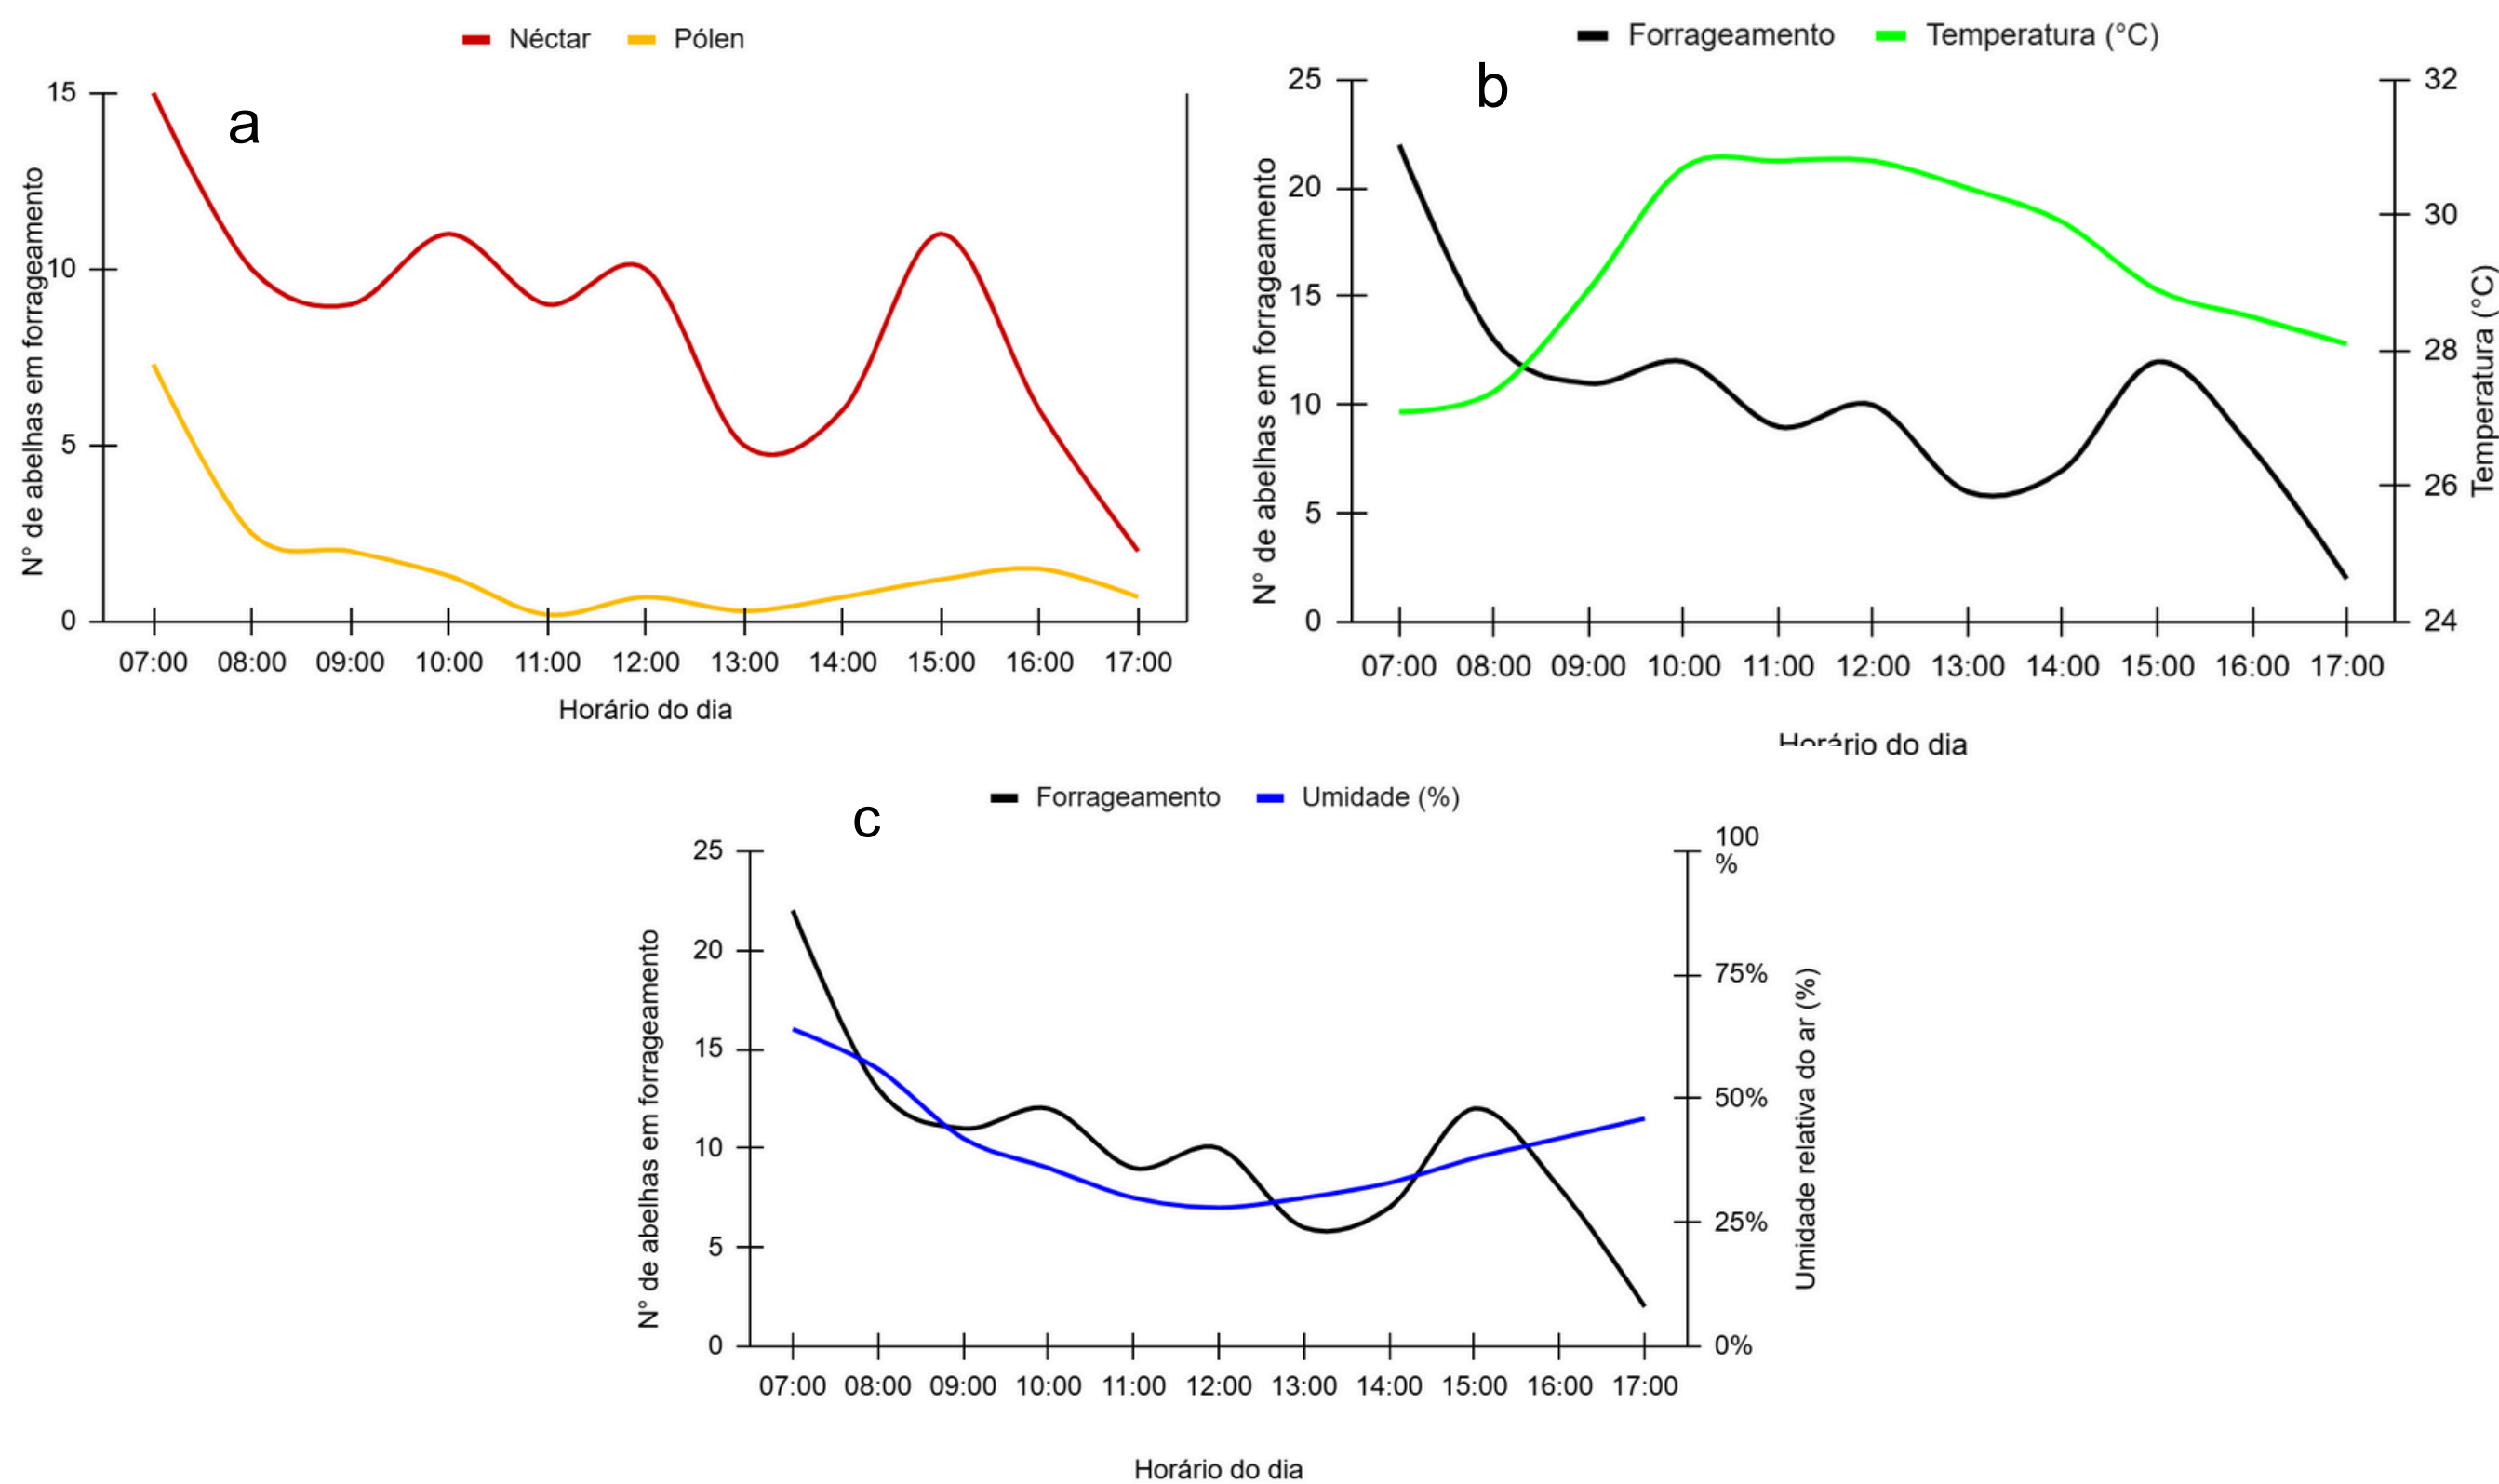

**Fig. 2** Seasonal foraging behavior of *M. scutellaris* during Summer 2023. a) Foraging patterns for nectar/water (red line) and polle/resins (yellow lines); b) Foraging patterns (black line) in relation to temperature fluctuations(green line); c) Foraging pattern (black line) in relation to variations in air humidity (blue line).

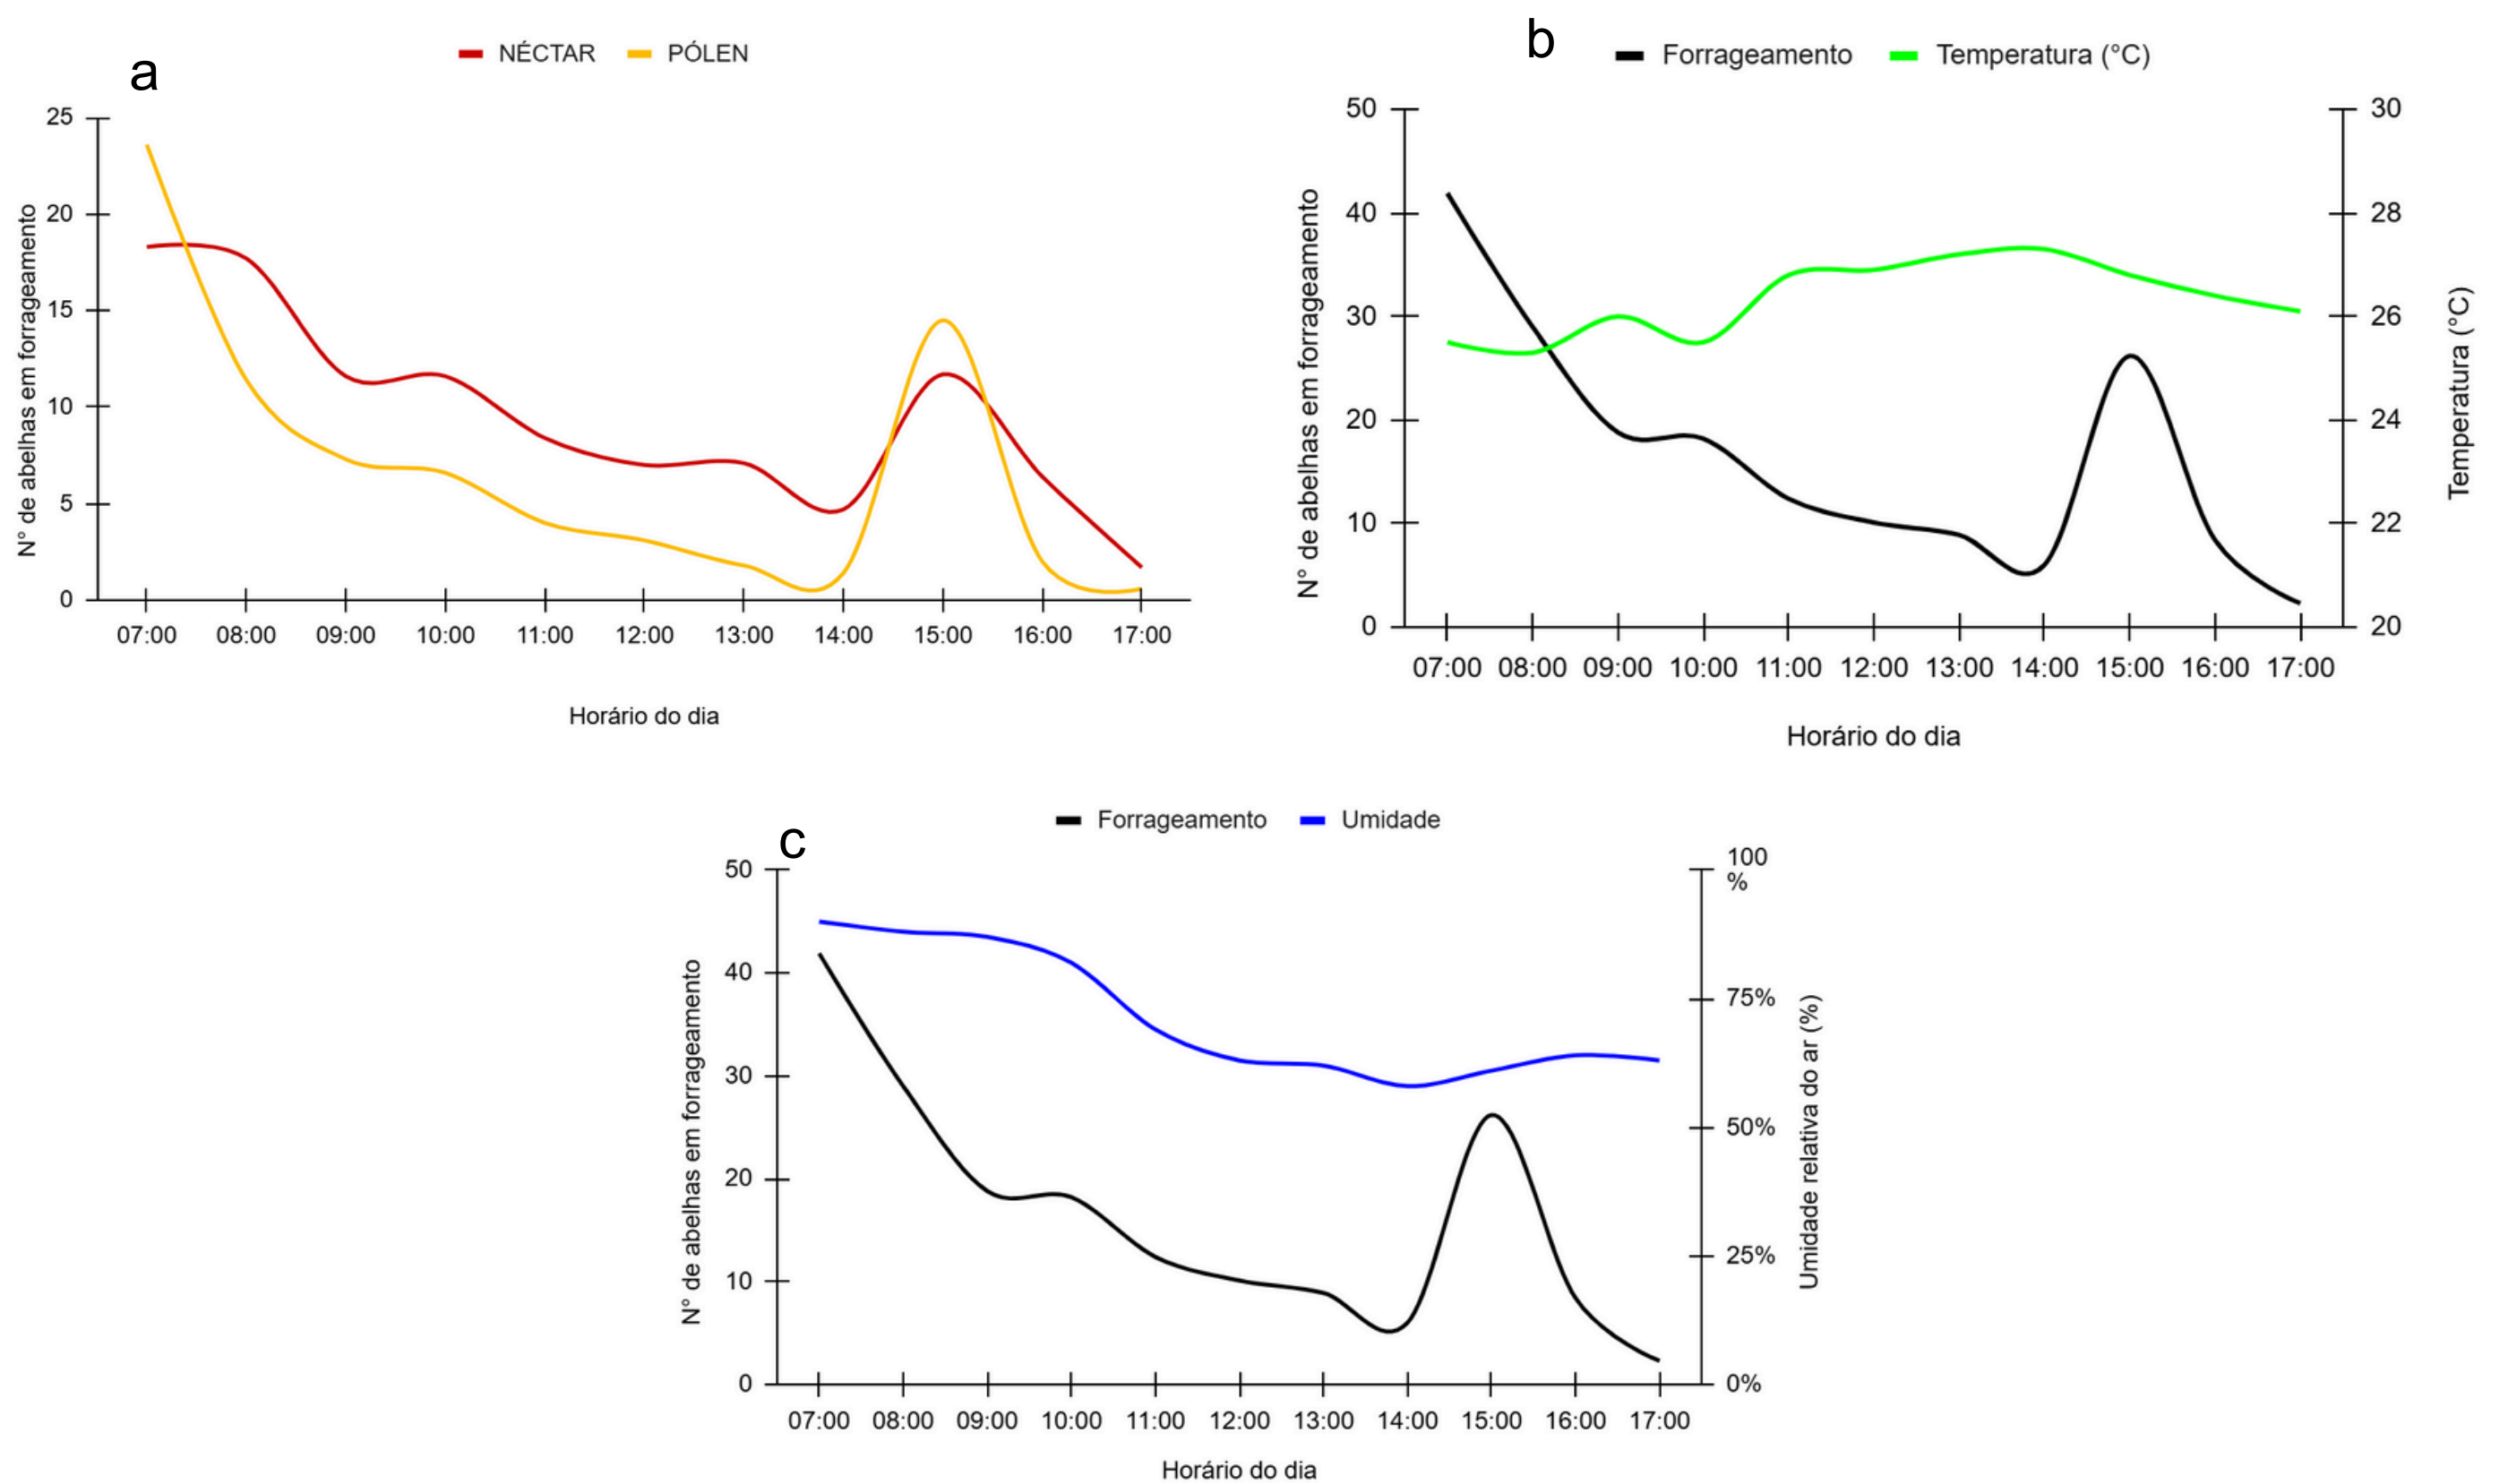

**Fig. 3** Seasonal foraging behavior of *M. scutellaris* during fall 2023. a) Foraging patterns for nectar/water (red line) and polle/resins (yellow lines); b) Foraging patterns (black line) in relation to temperature fluctuations (green line); c) Foraging pattern (black line) in relation to variations in air humidity (blue line).

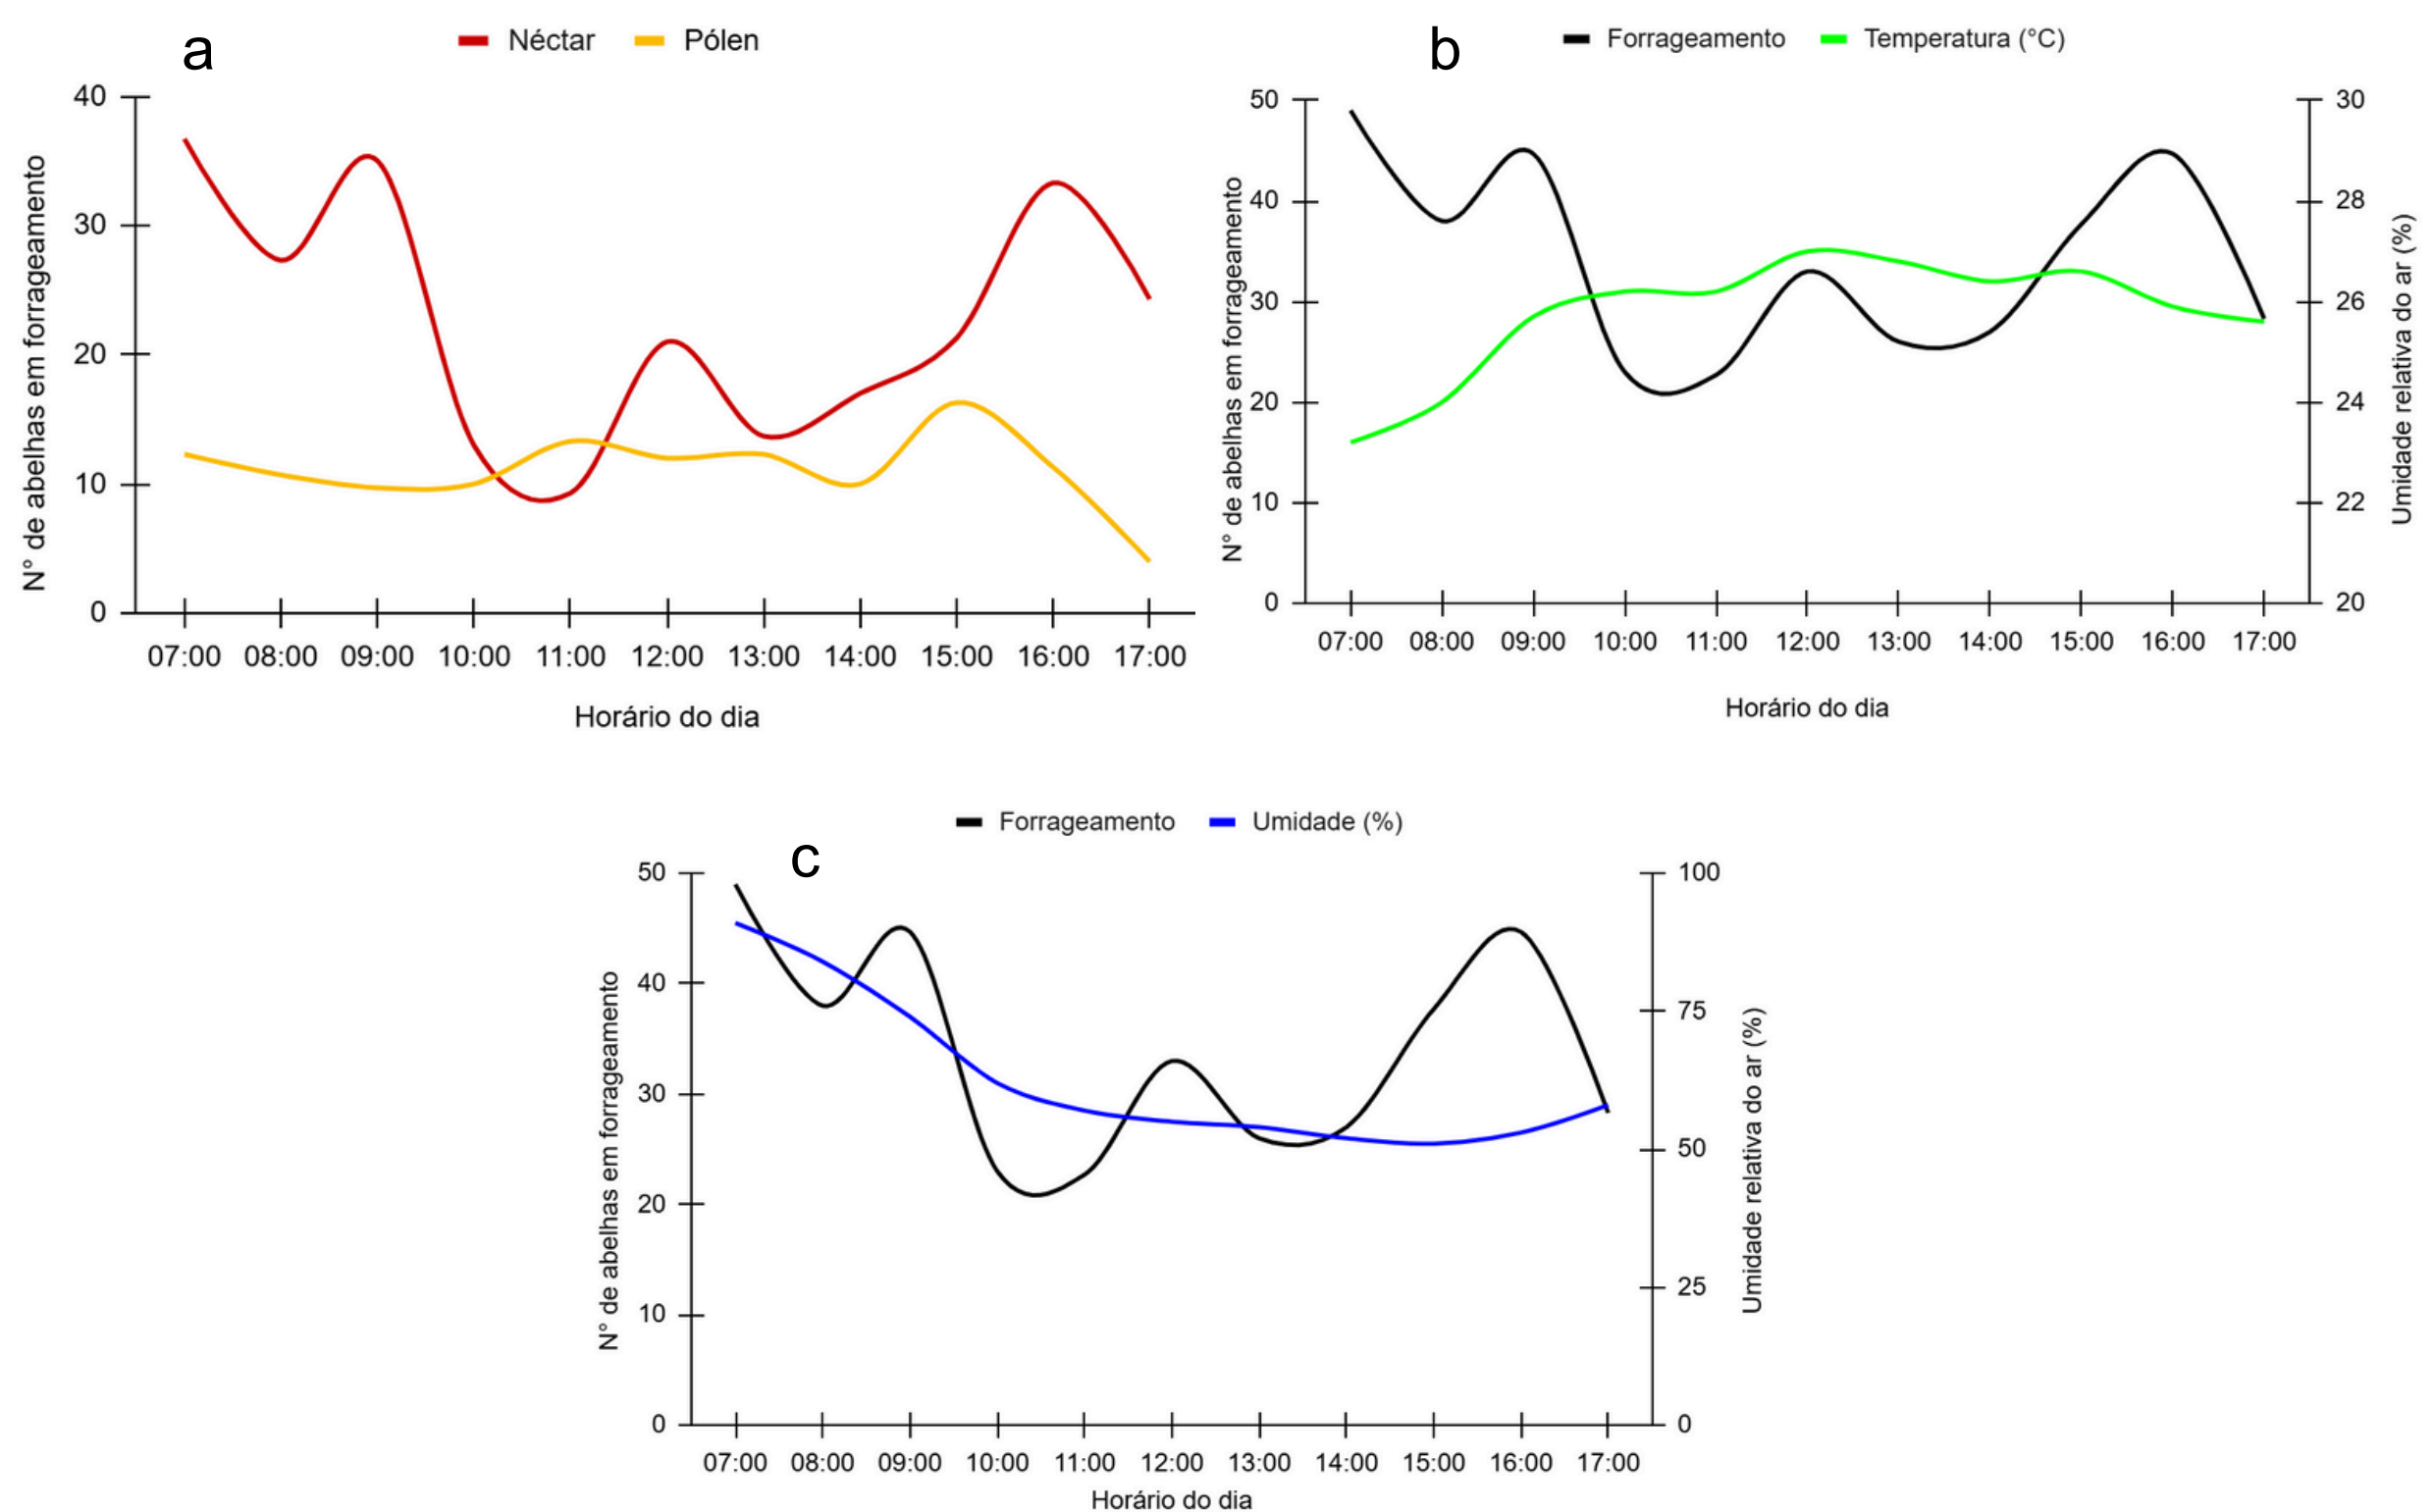

**Fig. 4** Seasonal foraging behavior of *M. scutellaris* during winter 2023. a) Foraging patterns for nectar/water (red line) and polle/resins (yellow lines); b) Foraging patterns (black line) in relation to temperature fluctuations (green line); c) Foraging pattern (black line) in relation to variations in air humidity (blue line).



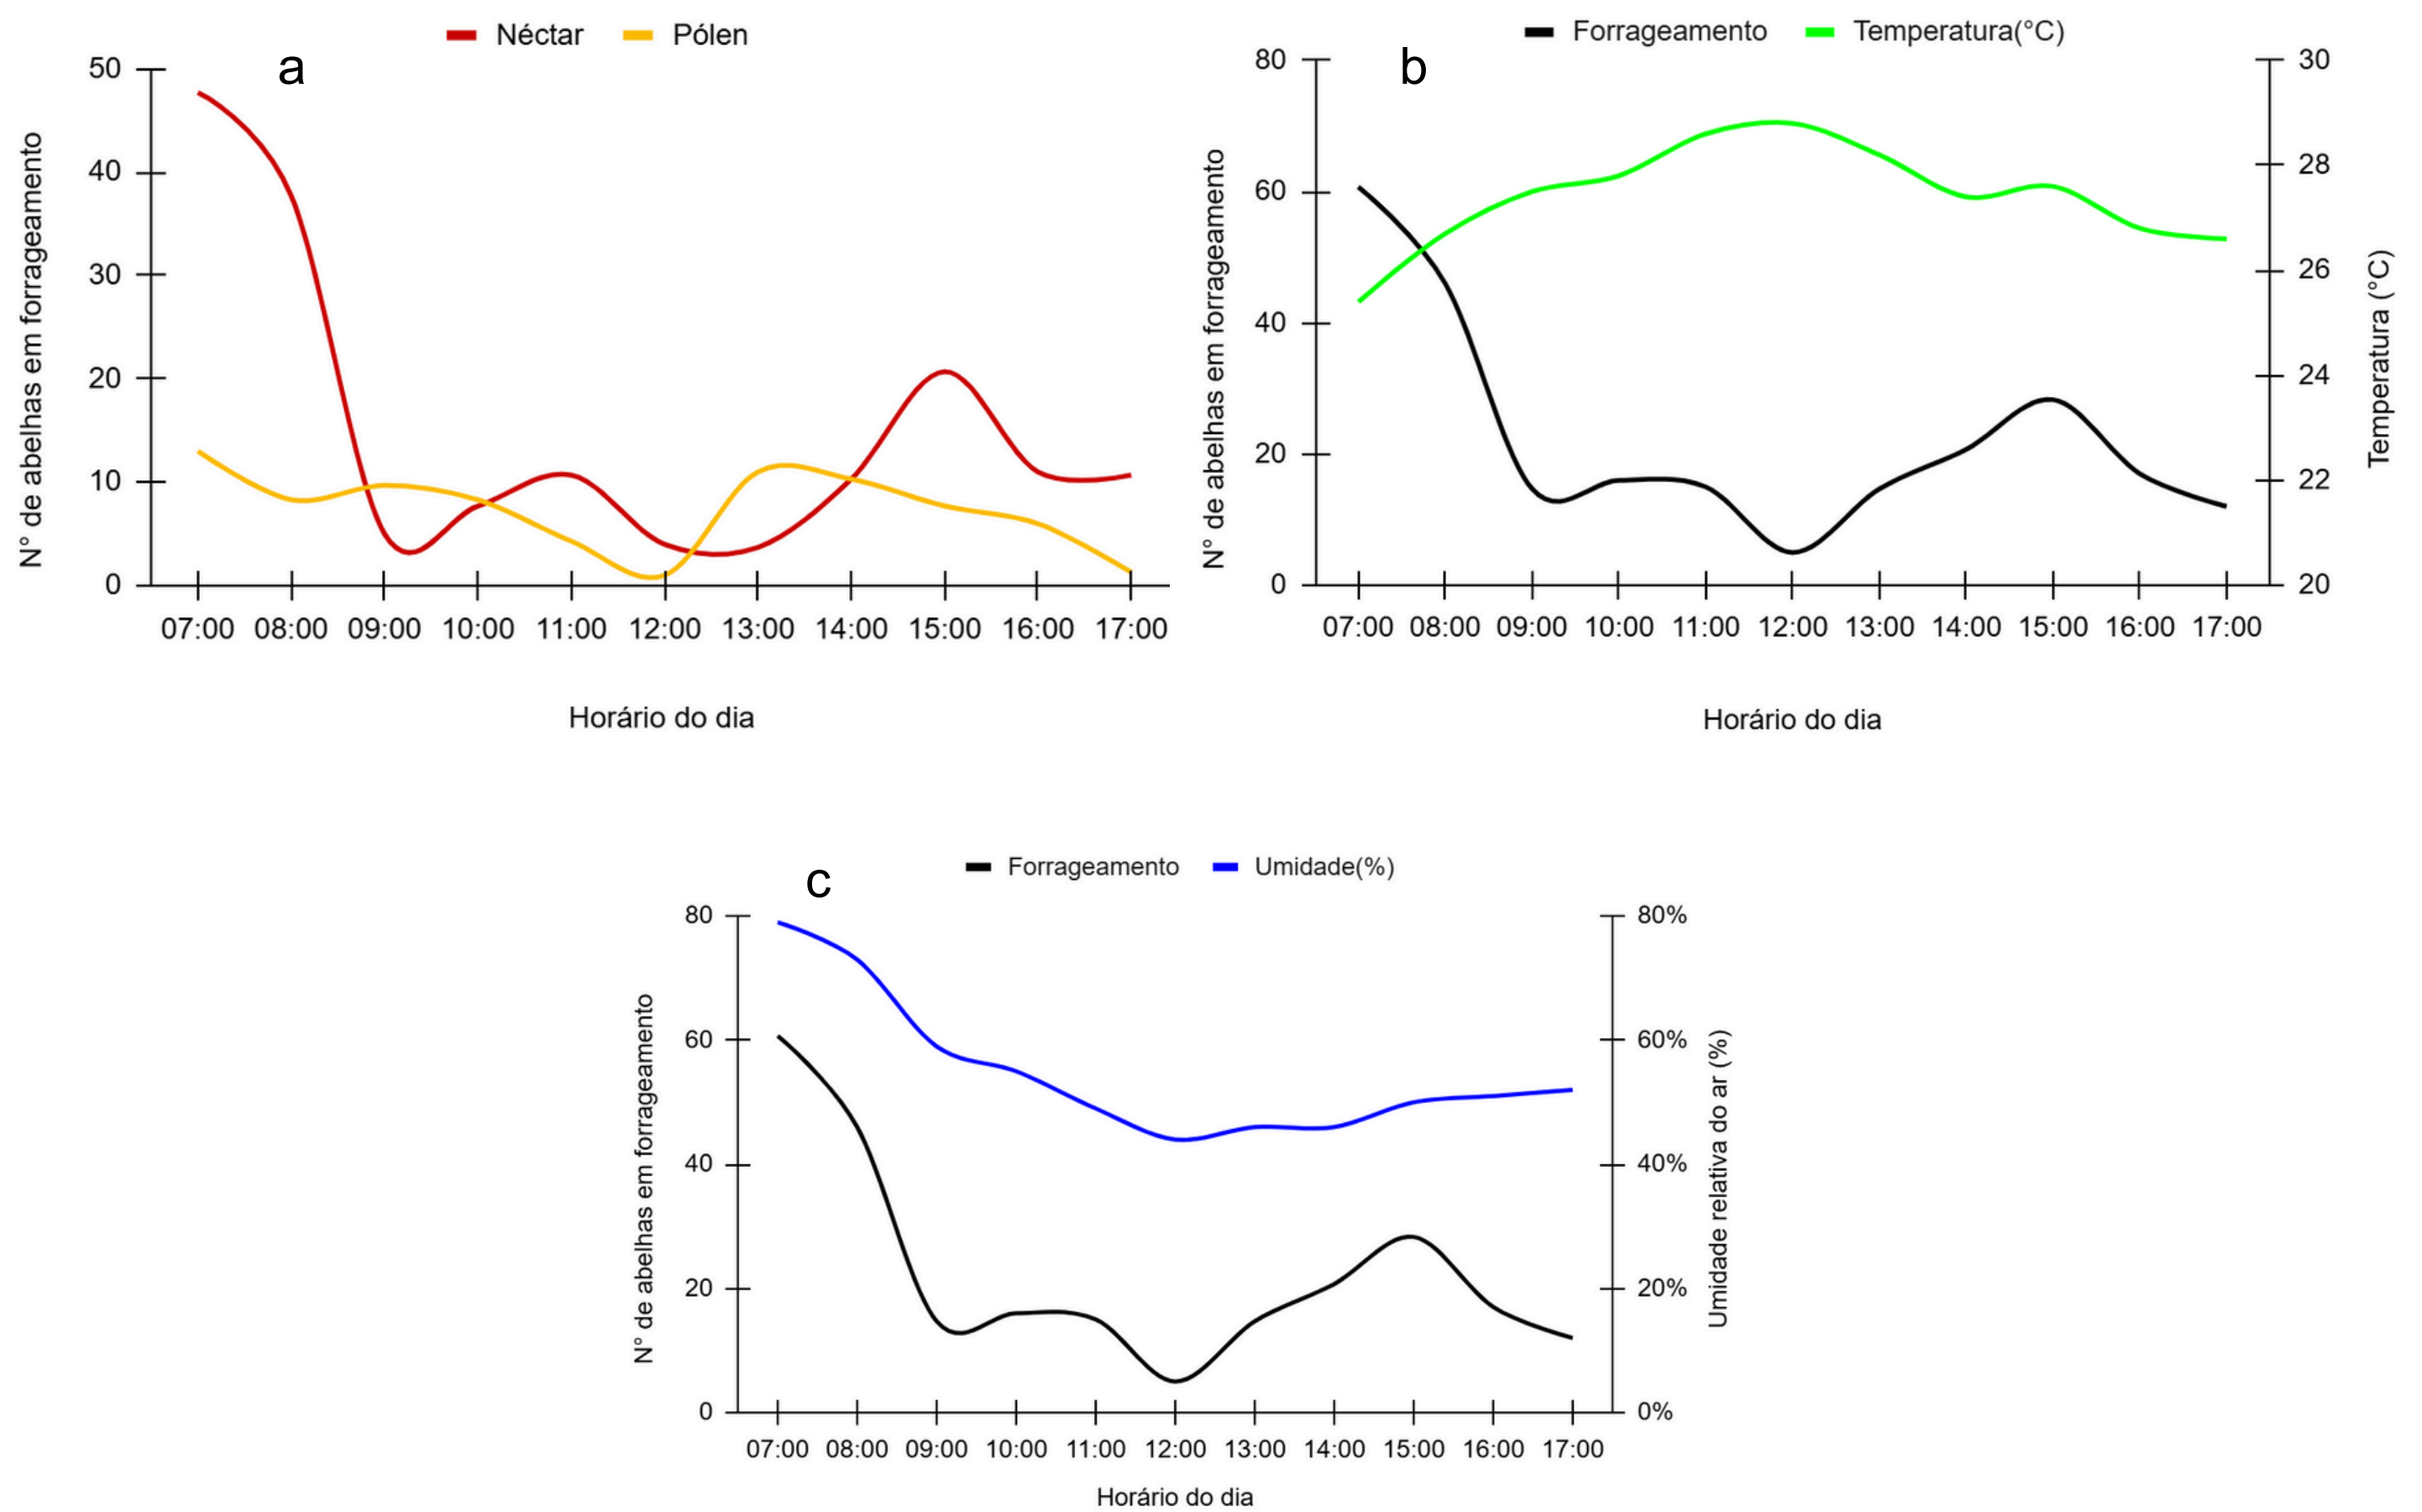

**Fig. 5** Seasonal foraging behavior of *M. scutellaris* during spring 2023. a) Foraging patterns for nectar/water (red line) and polle/resins (yellow lines); b) Foraging patterns (black line) in relation to temperature fluctuations (green line); c) Foraging pattern (black line) in relation to variations in air humidity (blue line).

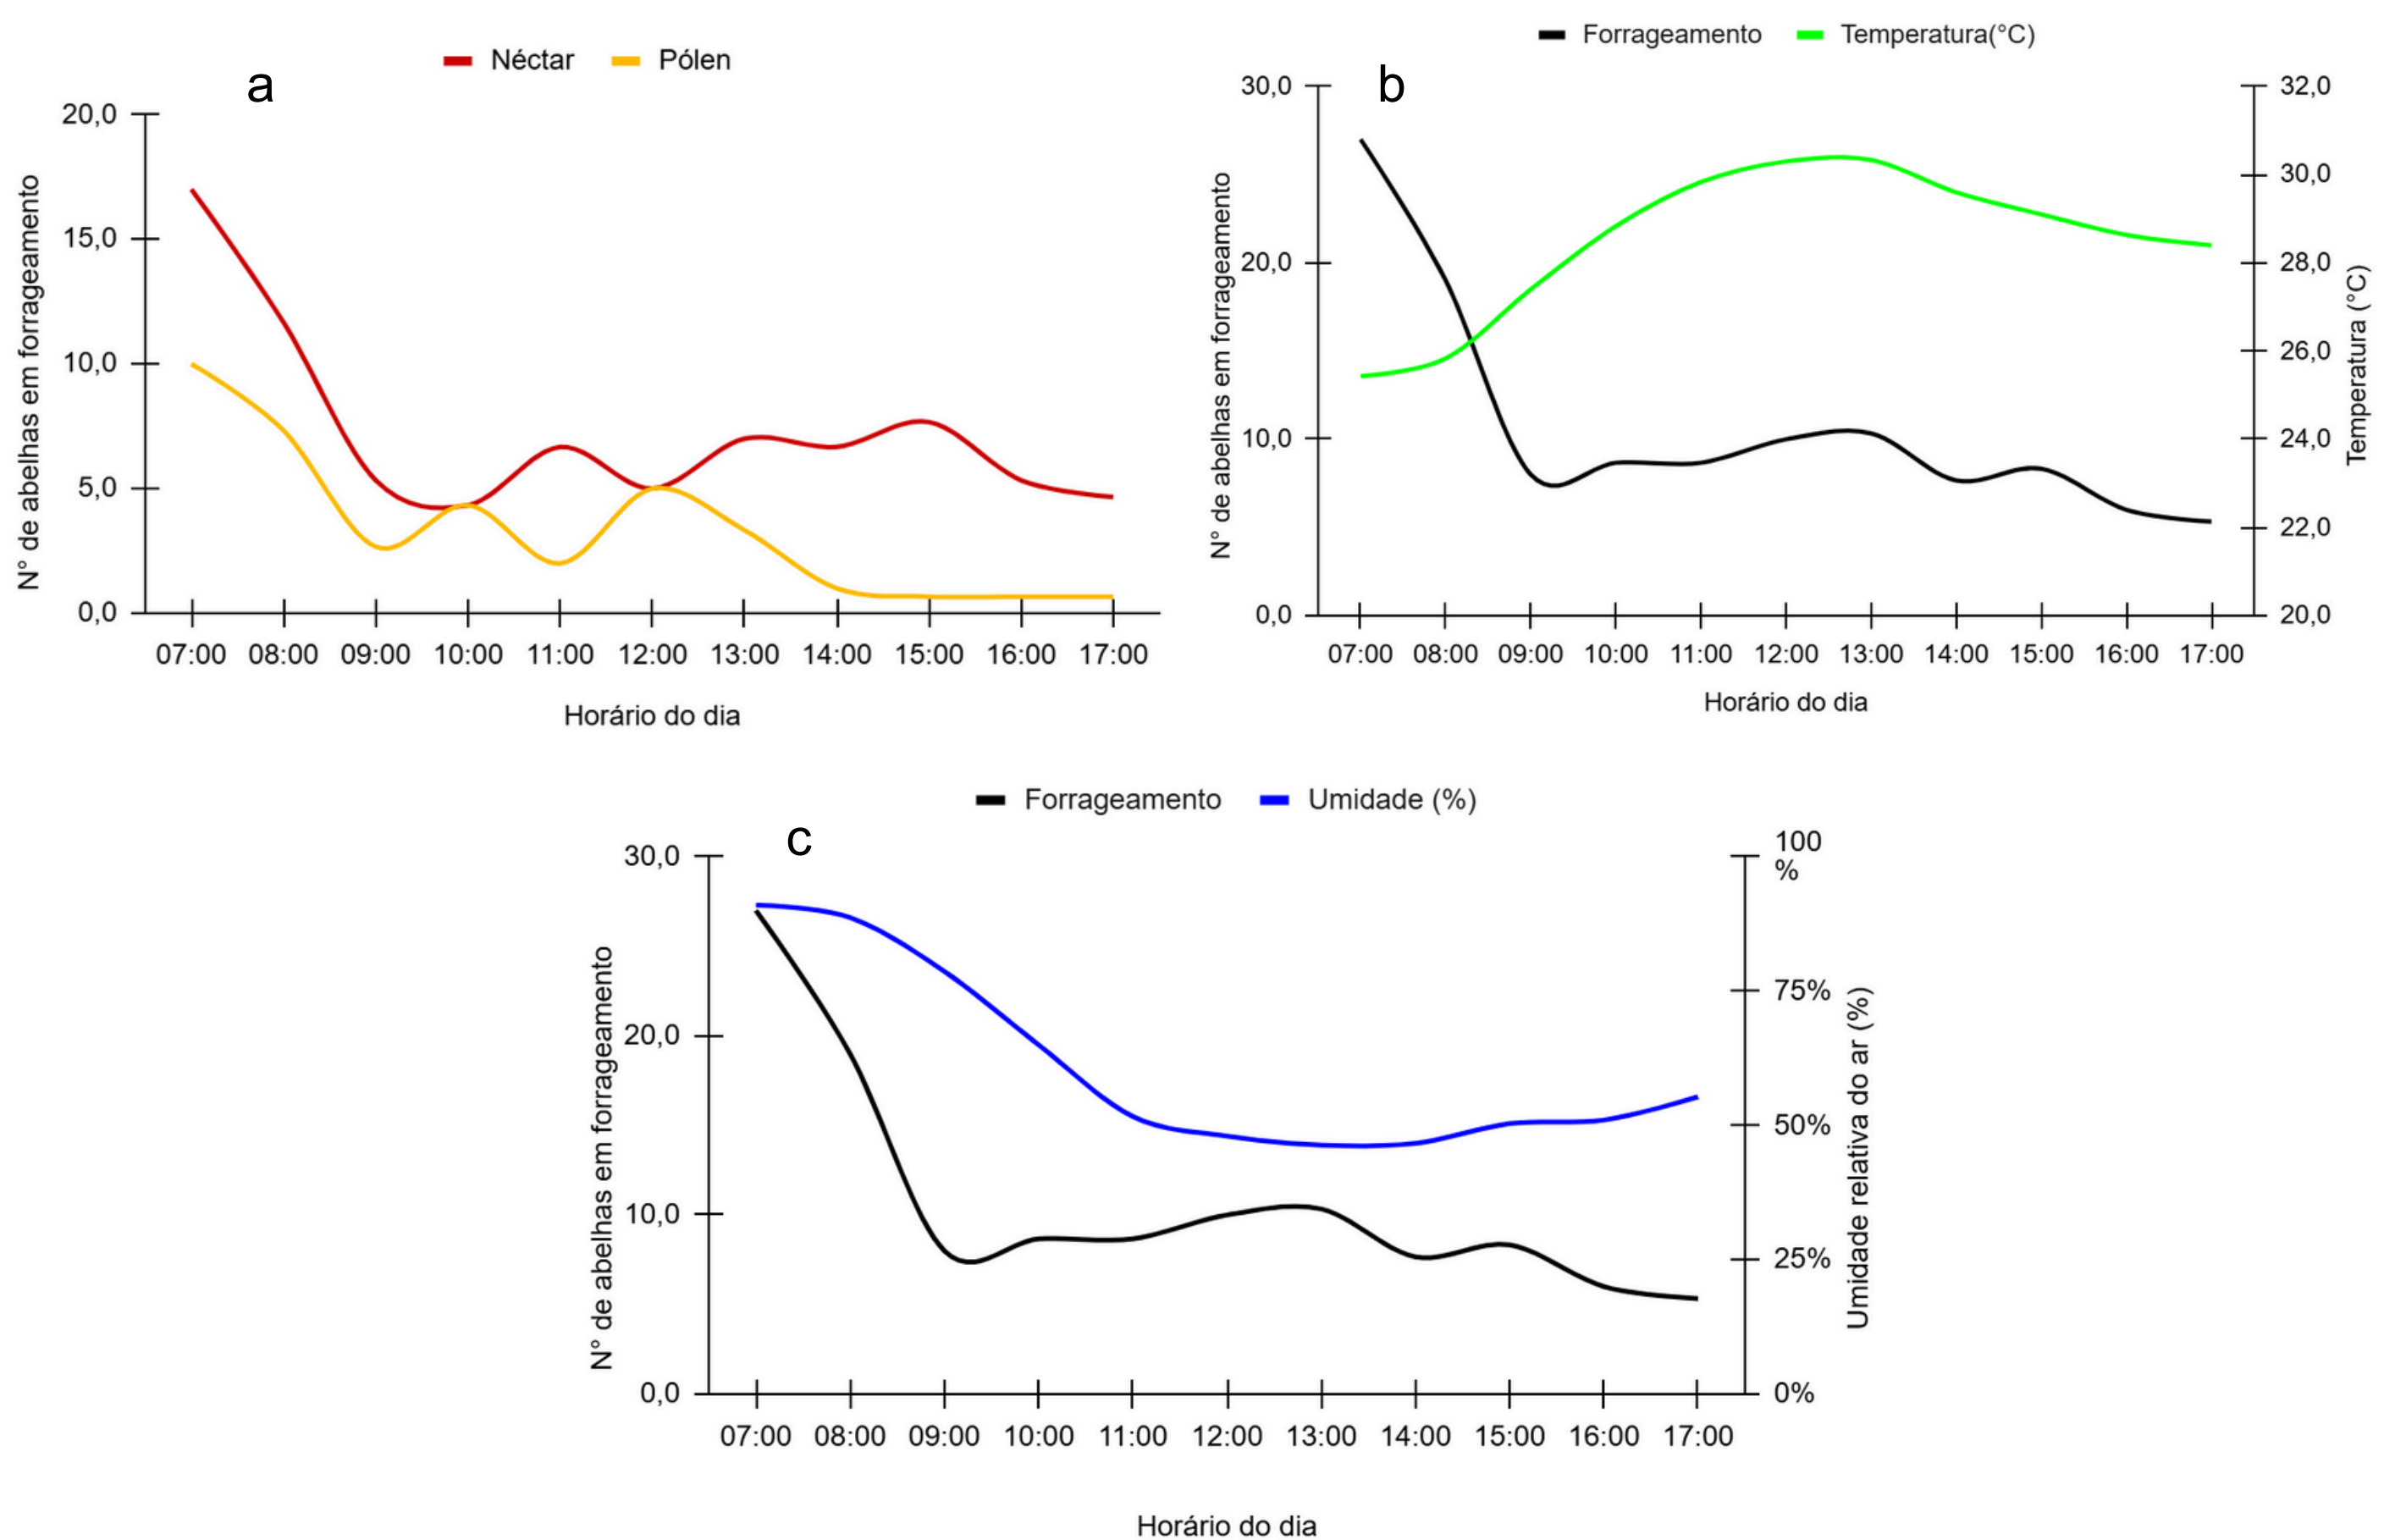

**Fig. 6** Seasonal foraging behavior of *M. scutellaris* during summer 2024. a) Foraging patterns for nectar/water (red line) and polle/resins (yellow lines); b) Foraging patterns (black line) in relation to temperature fluctuations (green line); c) Foraging pattern (black line) in relation to variations in air humidity (blue line).

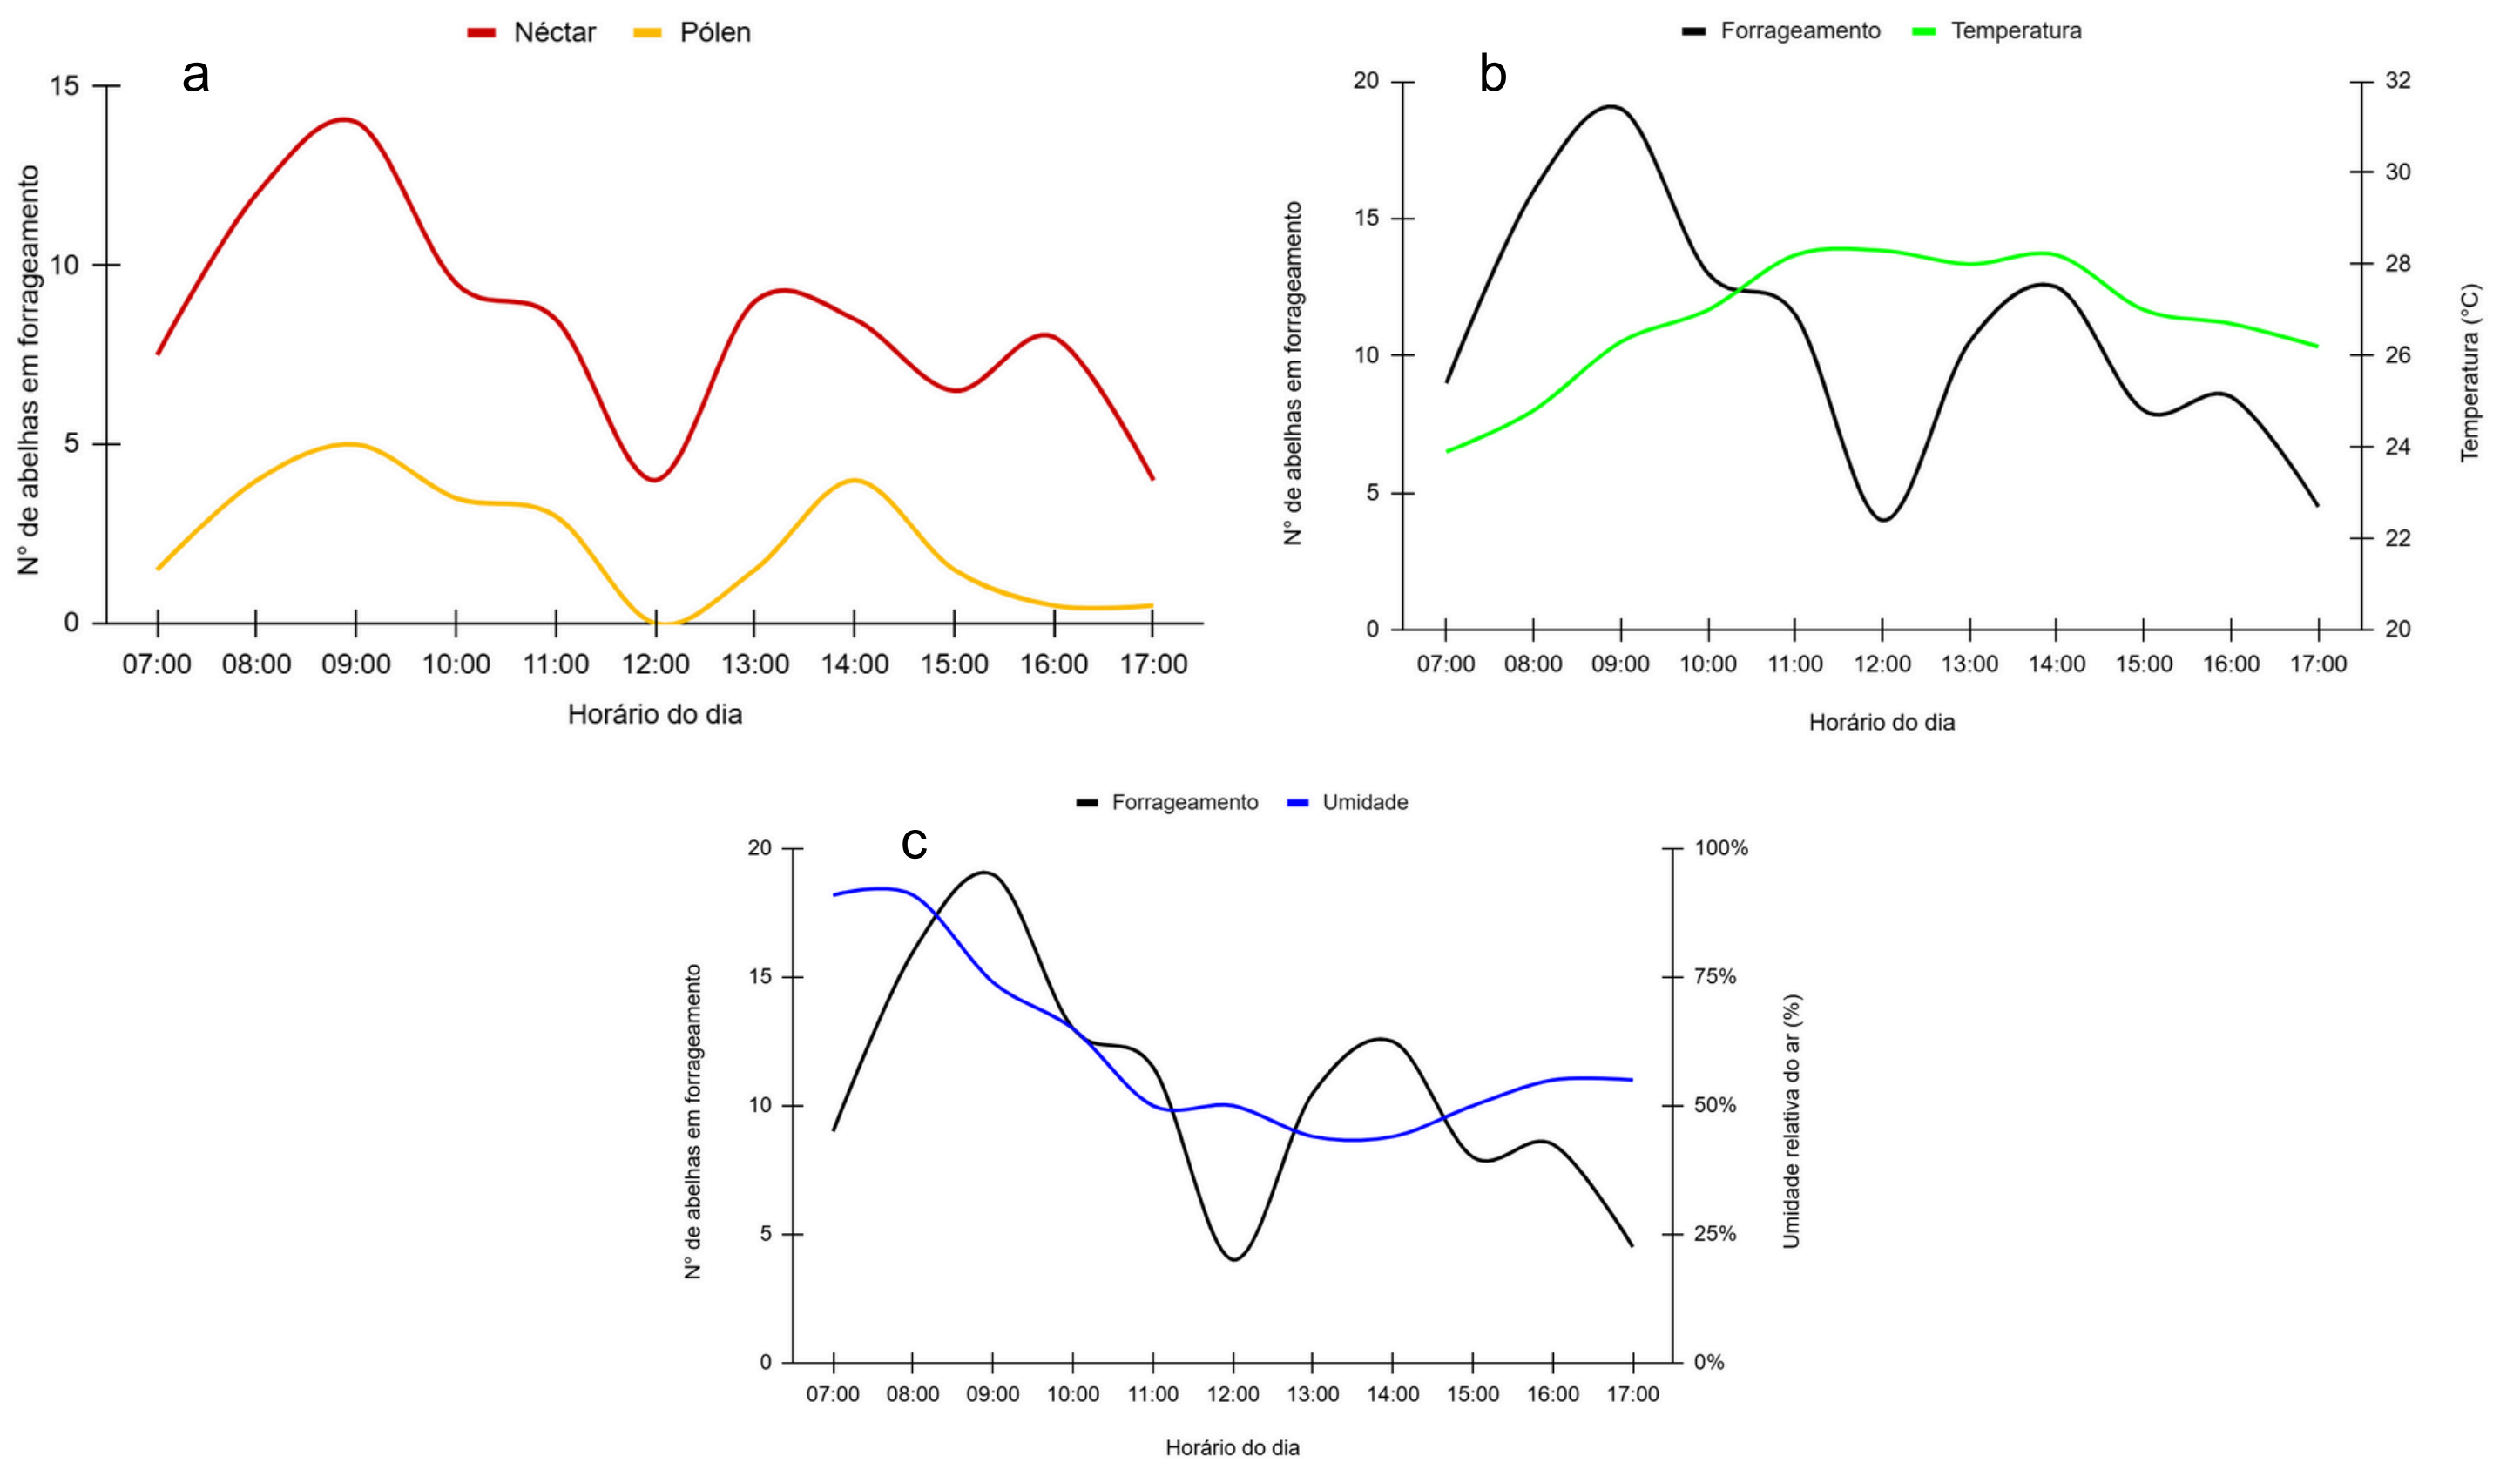

**Fig. 7** Seasonal foraging behavior of *M. scutellaris* during fall 2024. a) Foraging patterns for nectar/water (red line) and polle/resins (yellow lines); b) Foraging patterns (black line) in relation to temperature fluctuations(green line); c) Foraging pattern (black line) in relation to variations in air humidity (blue line).

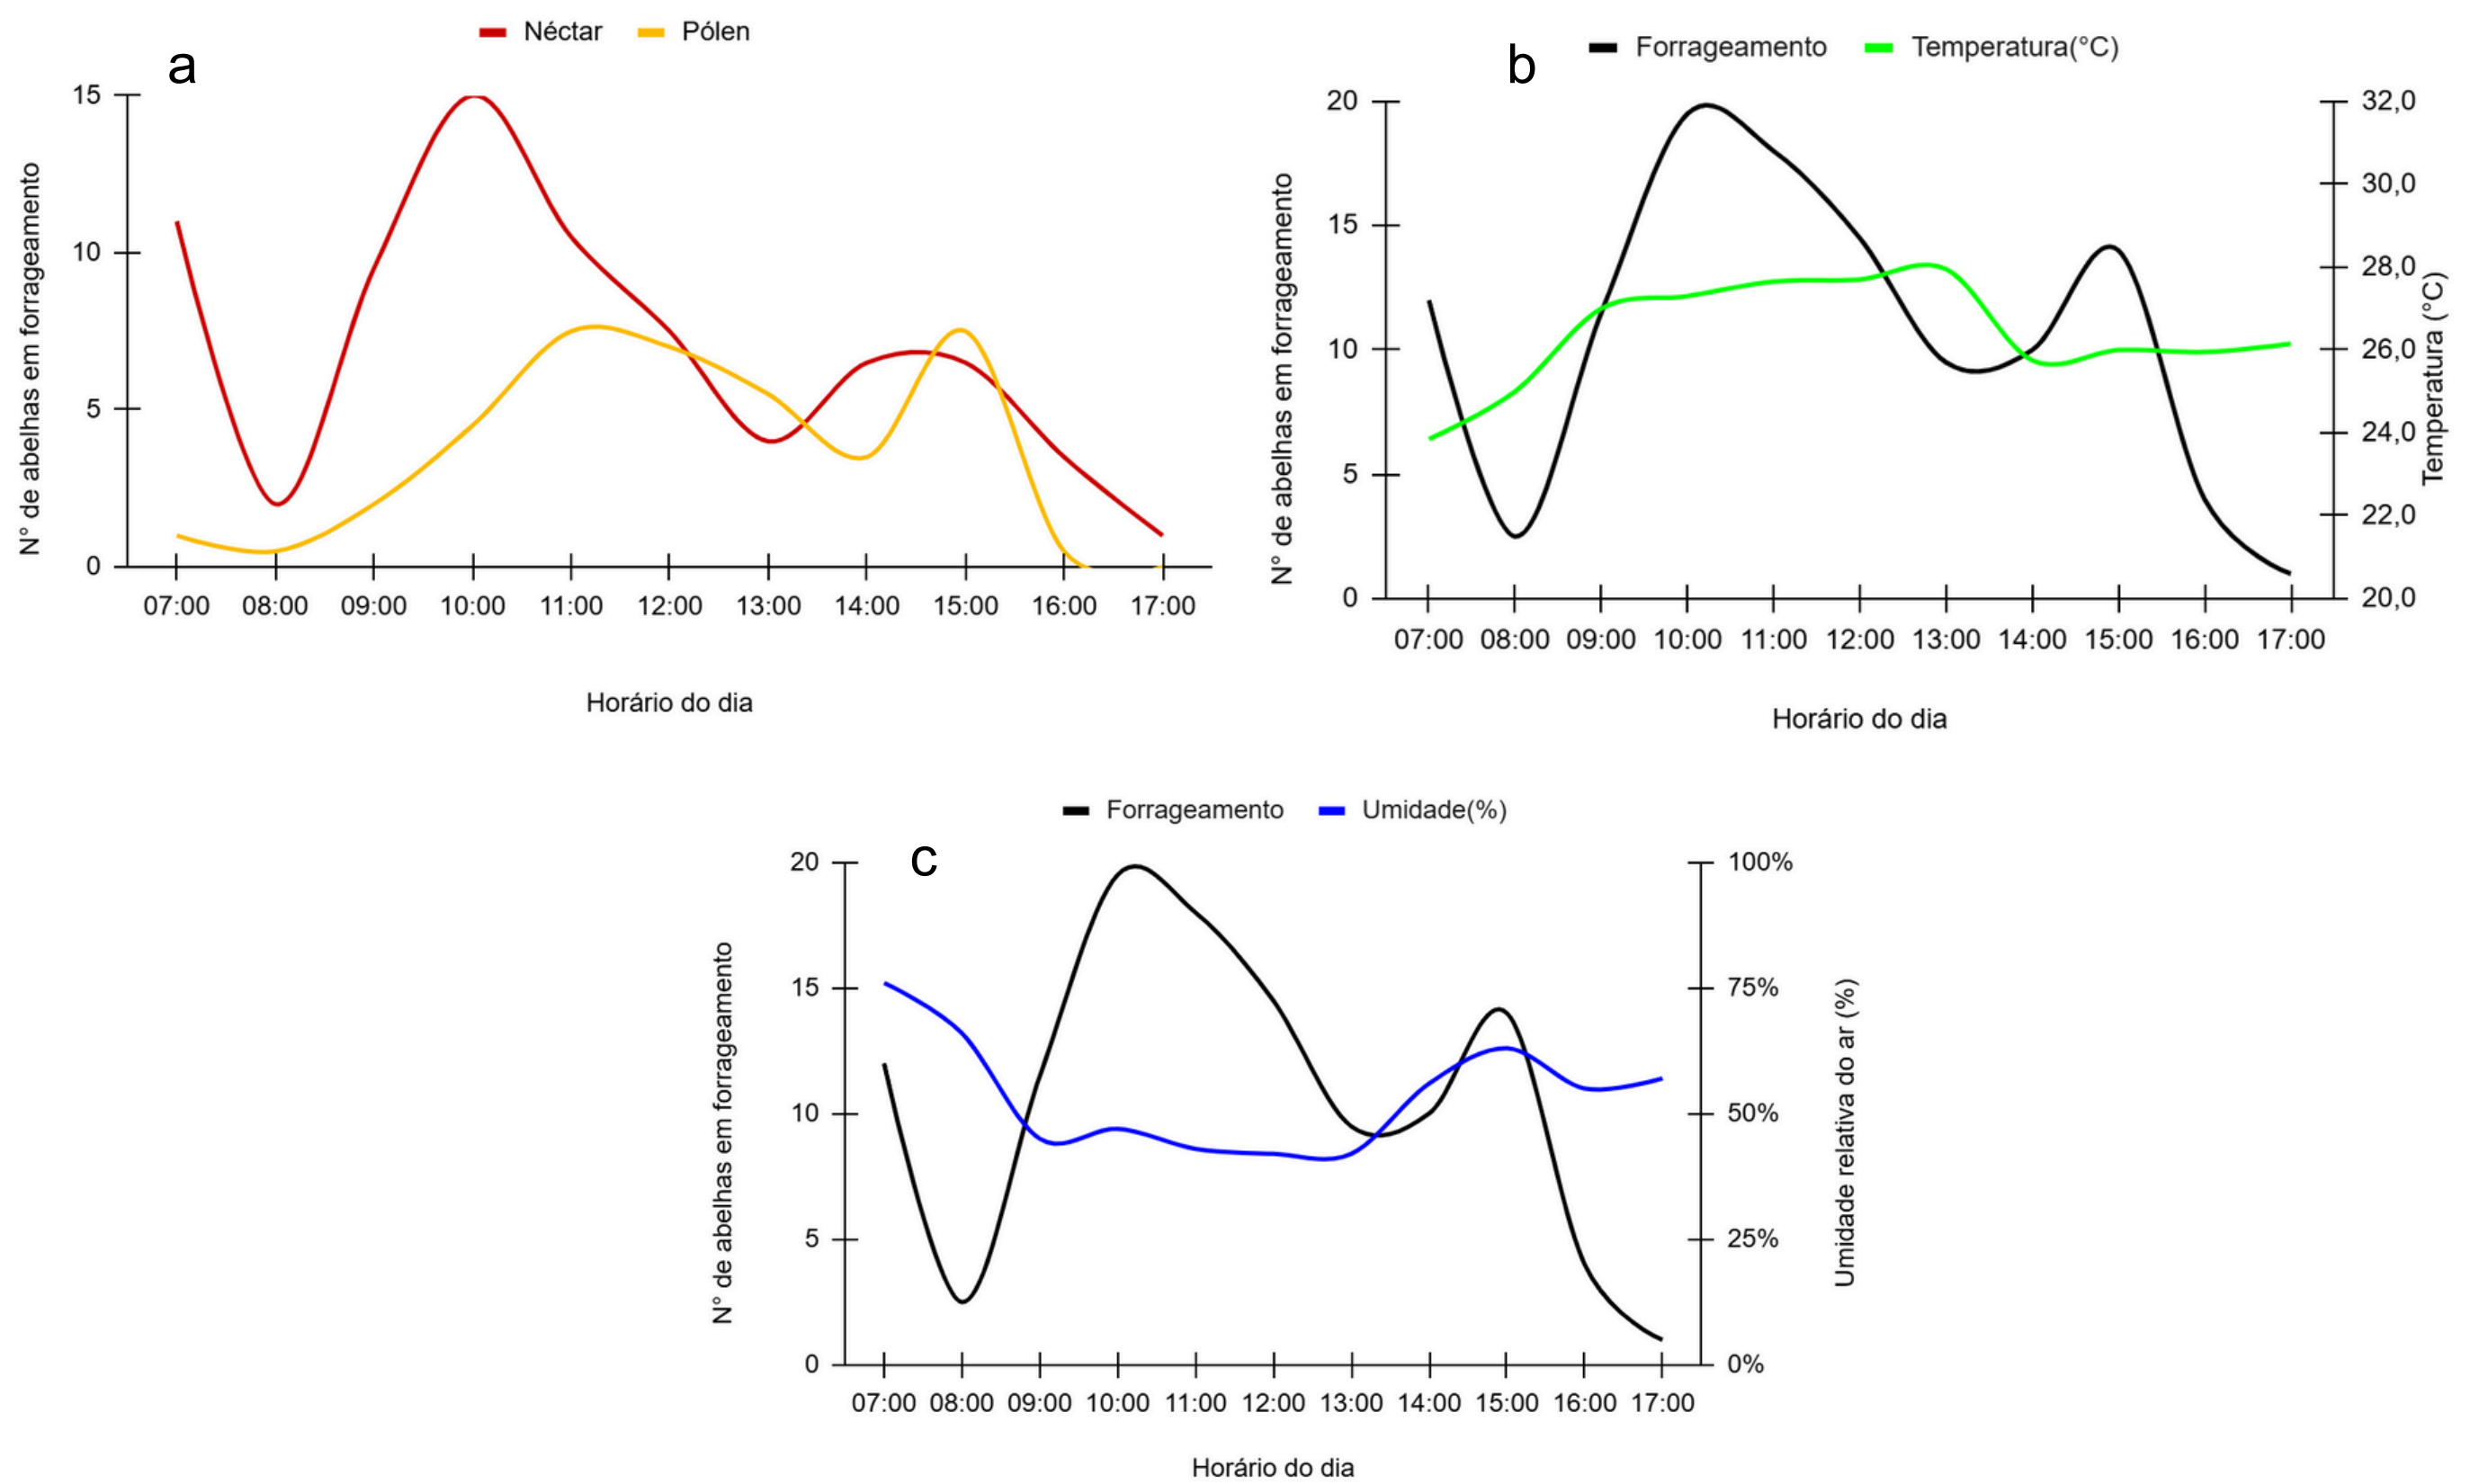

**Fig. 8** Seasonal foraging behavior of *M. scutellaris* during winter 2024. a) Foraging patterns for nectar/water (red line) and polle/resins (yellow lines); b) Foraging patterns (black line) in relation to temperature fluctuations(green line); c) Foraging pattern (black line) in relation to variations in air humidity (blue line).
